# Supplementary material for: An ultrafast water transport forward osmosis membrane: porous graphene
Source: Royal Society of Chemistry journal article supplement (doi:10.1039/c3ta14256f), 2013-12-10
Supplement: c3ta14256f.pdf [file c3ta14256f.pdf]

Electronic Supplementary Information

**Ultrafast Water Transport Forward Osmosis Membrane: Porous Graphene**

Jing-Gang Gai\*, Xiao-Lei Gong, Wei-Wei Wang, Xin Zhang, Wu-Li Kang

State Key Laboratory of Polymer Materials Engineering, Polymer Research Institute  
of Sichuan University, Chengdu, Sichuan 610065, China

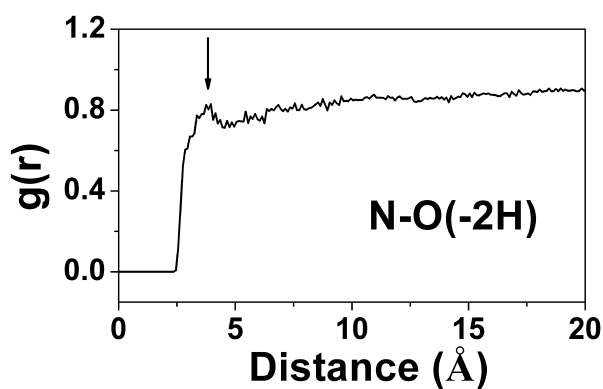

Figure S1. Radial distribution function  $g(r)$  curve of N with O(-2H) in the systems of GN3. O(-2H) are the oxygen atom in  $\text{H}_2\text{O}$ .

---

\*Corresponding authors. Tel.: +86 28 85467166; fax: +86 28 85402465. E-mail addresses:  
[gaijinggang@scu.edu.cn](mailto:gaijinggang@scu.edu.cn) (J-G. Gai)
